# Supplementary material for: Effectiveness of the ChAdOx1 nCoV-19 Coronavirus Vaccine (CovishieldTM) in Preventing SARS-CoV2 Infection, Chennai, Tamil Nadu, India, 2021
Source: MDPI journal article supplement (doi:10.3390/vaccines10060970), 2022-06-17
Supplement: s1 [file s1]

## Effectiveness of ChAdOx1 nCoV-19 Corona Virus Vaccine (Covishield™) in preventing SARS-CoV2 infection, Chennai, Tamil Nadu, India, 2021

### SUPPLEMENTARY FILE

| TABLES  |                                                                                                                                                                                                                                          |
|---------|------------------------------------------------------------------------------------------------------------------------------------------------------------------------------------------------------------------------------------------|
| S1      | Socio-demographic characteristics of the households participated in the COVID-19 vaccine effectiveness cohort study, Chennai, 2021 (N=19,211)                                                                                            |
| S2      | Socio-demographic characteristics of the individuals who participated in the COVID-19 vaccine effectiveness cohort study, Chennai, 2021 (N=69,435)                                                                                       |
| S3      | COVID-19 incidence and its outcomes among individuals $\geq 45$ years in the COVID-19 vaccine effectiveness cohort study, Chennai, 2021 (N=21,793)                                                                                       |
| FIGURES |                                                                                                                                                                                                                                          |
| S1      | The trend in COVID-19 cases in the contiguous divisions of Greater Chennai Corporation, March 2020 – April 2021                                                                                                                          |
| S2      | Tamil Nadu COVID-19 Case Management Protocol                                                                                                                                                                                             |
| S3      | Single nucleotide variations in the SARS CoV-2 sequences retrieved from the clinical samples collected from the 45+ age group individuals who were positive for SARS-CoV-2 in COVID-19 Vaccine effectiveness Study, Chennai, India, 2021 |

**Supplementary Table S1. Socio-demographic characteristics of the households participated in the COVID-19 vaccine effectiveness cohort study, Chennai, 2021 (N=19,211)**

| Characteristic                                    |                          | n      | %    |
|---------------------------------------------------|--------------------------|--------|------|
| Division                                          | 147                      | 7,555  | 39.3 |
|                                                   | 151                      | 4,155  | 21.6 |
|                                                   | 153                      | 7,501  | 39.1 |
| Area                                              | Slum                     | 3,466  | 18.0 |
|                                                   | Non-Slum                 | 15,745 | 82.0 |
| Type of house                                     | Kucha                    | 197    | 1.0  |
|                                                   | Semi pucca               | 658    | 3.4  |
|                                                   | Pucca                    | 18,356 | 95.5 |
| Ration card (indicative of socio-economic status) | Below poverty line (BPL) | 1,101  | 5.7  |
|                                                   | Non-BPL                  | 15,086 | 78.5 |
|                                                   | No card                  | 3,024  | 15.7 |
| Number of family members                          | <4                       | 8,831  | 46.0 |
|                                                   | ≥4                       | 10,380 | 54.0 |
| Rooms for sleeping                                | 1                        | 6,312  | 32.9 |
|                                                   | 2                        | 10,113 | 52.6 |
|                                                   | ≥3                       | 2,786  | 14.5 |
| Number of people per room                         | 1                        | 2,765  | 14.4 |
|                                                   | 2                        | 10,324 | 53.7 |
|                                                   | 3                        | 4,069  | 21.2 |
|                                                   | ≥4                       | 2,053  | 10.7 |

**Supplementary Table S2. Socio-demographic characteristics of the individuals who participated in the COVID-19 vaccine effectiveness cohort study, Chennai, 2021 (N=69,435)**

| Characteristic       |                                | n      | %    |
|----------------------|--------------------------------|--------|------|
| Division             | 147                            | 27,760 | 40.0 |
|                      | 151                            | 15,090 | 21.7 |
|                      | 153                            | 26,585 | 38.3 |
| Gender               | Male                           | 34,500 | 49.7 |
|                      | Female                         | 34,836 | 50.2 |
|                      | Transgender                    | 99     | 0.1  |
| Age group (in years) | 0 - 17                         | 15,135 | 21.8 |
|                      | 18 - 44                        | 32,507 | 46.8 |
|                      | 45 - 59                        | 13,114 | 18.9 |
|                      | 60 - 98                        | 8679   | 12.5 |
| Education            | No formal education            | 6918   | 10.0 |
|                      | School education               | 35,152 | 50.6 |
|                      | College education              | 27,365 | 39.4 |
| Occupation           | Health care / Frontline worker | 1418   | 2.0  |
|                      | Others                         | 68,017 | 98.0 |
| Comorbidity          | Known HT                       | 4283   | 7.9  |
|                      | Known DM                       | 4912   | 9.0  |
|                      | Others                         | 1138   | 2.1  |
| Vaccination status   | Unvaccinated                   | 38,892 | 56.0 |
|                      | Received only one dose         | 16,700 | 24.1 |
|                      | Received both the doses        | 13,843 | 19.9 |

HT - Hypertension

DM - Diabetes Mellitus

Supplementary Table S3. COVID-19 incidence and its outcomes among the individuals  $\geq 45$  years in the COVID-19 vaccine effectiveness cohort study, Chennai, 2021 (N=21,793)

|                      |             | Total  | COVID-19 positive | Incidence per 100,000 population | Recovered without oxygen support |      | Recovered with Oxygen Support |     | Recovered with ventilator support |     | Died |     | No Information |     |
|----------------------|-------------|--------|-------------------|----------------------------------|----------------------------------|------|-------------------------------|-----|-----------------------------------|-----|------|-----|----------------|-----|
| Characteristic       |             | N      |                   |                                  | n                                | %    | n                             | %   | n                                 | %   | n    | %   | n              | %   |
| Overall              |             | 21,793 | 303               | 1390                             | 259                              | 85.5 | 20                            | 6.6 | 1                                 | 0.3 | 12   | 4.0 | 11             | 3.6 |
| Gender               | Male        | 10,916 | 145               | 1328                             | 123                              | 84.8 | 8                             | 5.5 | 0                                 | 0.0 | 7    | 4.8 | 7              | 4.8 |
|                      | Female / TG | 10,877 | 158               | 1453                             | 136                              | 86.1 | 12                            | 7.6 | 1                                 | 0.6 | 5    | 3.2 | 4              | 2.5 |
| Age Group (in years) | 45 - 59     | 13,114 | 185               | 1411                             | 167                              | 90.3 | 9                             | 4.9 | 1                                 | 0.5 | 1    | 0.5 | 7              | 3.8 |
|                      | $\geq 60$   | 8679   | 118               | 1360                             | 92                               | 78.0 | 11                            | 9.3 | 0                                 | 0.0 | 11   | 9.3 | 4              | 3.4 |

### COVID19 case trend for the divisions in Greater Chennai Corporation, Mar 2020- Apr 2021

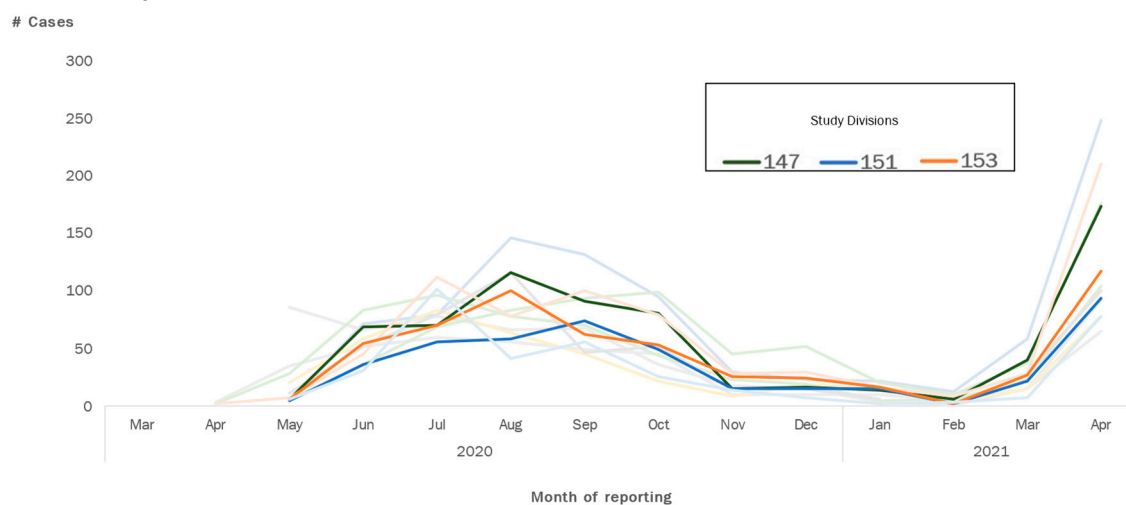

**Supplementary Figure S1.** The trend in COVID-19 cases in the contiguous divisions of Greater Chennai Corporation, March 2020–April 2021. The graph shows the rising trend in cases in the selected divisions 147, 151 and 153.

# Tamil Nadu COVID-19

## Case Management Protocol

COVID-19 positive or suspect  
patients (negative or untested)

### Measure

SpO<sub>2</sub> AND Respiratory rate (RR)

### COVID-19 suspected symptoms

- ☐ Continuous fever
- ☐ Sore throat
- ☐ Breathlessness
- ☐ Fatigue
- ☐ Cough
- ☐ Myalgia
- ☐ Loss of taste/smell
- ☐ Diarrhea

SpO<sub>2</sub> > 94% AND  
RR < 24/min

### Home-based treatment

Prescribed at testing centres,  
screening/triage centres, health facilities,  
outreach camps, and home visits

#### CATEGORY 1

#### TREATMENT

- Tab. Vitamin C 500mg OD x 5 days
  - Tab. Zinc 50mg OD x 5 days
  - Tab. Paracetamol 500 mg 4 times a day AND SOS if having fever or myalgia
- ✓ Treat comorbid conditions
  - ✓ Maintain hydration
  - ✓ Prone position is advisable

**Note:** If the patient's house is unsuitable for home isolation, shift to COVID care centre

#### Red flag signs

Seek PHC/Screening Centre/  
Telemedicine

- i. Persistent fever > 5 days OR
- ii. Persistent cough OR
- iii. Breathlessness OR Fatigue
- iv. SpO<sub>2</sub> 90-94% OR RR 24-30/min

**Call 104** for admission at Covid-19 hospitals, if SpO<sub>2</sub> < 90% OR RR > 30/min

SpO<sub>2</sub> 90-94% OR  
RR 24-30/min

### Primary care

Treat at Primary Health Centre (PHC),  
COVID Care Centre (CCC), or  
COVID Health Centre (CHC)  
(should have oxygen available)

#### CATEGORY 2

#### INVESTIGATIONS

Complete blood count, X-ray chest if available,  
capillary blood glucose/plasma glucose,  
blood pressure

#### TREATMENT (A + B + C + D)

- A**
- Oxygen 2-4 liters/min and titrate as per guidelines
  - Prone position 2-4 hours proning for 4-8 times per day
- B**
- Tab. Vitamin C 500mg OD x 5 days
  - Tab. Zinc 50mg OD x 5 days
  - Tab. Ranitidine 150mg BD x 5 days
  - Tab. Paracetamol 500 mg 4 times a day AND SOS - if having fever or myalgia
- C** Choose one of the following four:
1. Tab. Methylprednisolone 16mg BD x 7 days
  2. Tab. Dexamethasone 8mg [equivalent to 6mg salt] OD x 7 days
  3. If vomiting present, choose 3 or 4
  4. IV Inj. Methyl Prednisolone 0.5mg/kg per day not exceeding 40mg/day x 7 days
  5. IV Inj. Dexamethasone 8mg [equivalent to 6mg salt] OD x 7 days
- D** Choose one of the following two:
1. Low molecular weight Heparin (Enoxaparin) 40mg (0.4ml) SC OD OR
  2. Unfractionated Heparin 5000U SC BD
- Do not start anticoagulant if H/O bleeding disorders or platelet count < 1 lakh per mm<sup>3</sup> and Refer to COVID hospitals
- ✓ Treat comorbid conditions
  - ✓ Adequate hydration
  - ✓ Strict glycemic and BP control - if two random blood sugar readings > 300 mg/dl - Refer to hospital

**Note:** Admit COVID Suspects/Negatives in a separate ward away from the COVID ward

#### Red flag signs

If the patient is not improving and SpO<sub>2</sub> < 90% refer to Covid-19 Hospital

SpO<sub>2</sub> < 90% OR  
RR > 30/min

### Pre-hospital care

Initiate treatment at PHC, CCC & CHC then shift to Medical College, District Headquarter Hospital, or Dedicated COVID Hospitals

#### CATEGORY 3

#### TREATMENT (A + B + C)

During transportation or waiting for the bed

- Oxygen If SpO<sub>2</sub> < 90%, initiate low flow as per guidelines
- B. Choose one of the following four:**
1. IV Inj. Methyl Prednisolone 0.5 mg/kg per day not exceeding 40mg/day x 7 days
  2. IV Inj. Dexamethasone 8mg OD [equivalent to 6mg salt]
  3. Tab. Methylprednisolone 16mg BD
  4. Tab. Dexamethasone 8mg OD [equivalent to 6mg salt]
- C. Choose one of the following two:**
1. Low Molecular Weight Heparin (LMWH) 0.4ml SC OD
  2. Unfractionated Heparin 5000 U SC BD
- Do not start anticoagulant if H/O bleeding disorders, and platelet count < 1 lakh per mm<sup>3</sup>

**Note:** This protocol does not include hospital-based treatment

#### Stepdown to Covid Health Centre

If SpO<sub>2</sub> > 92% for 48 hrs. after weaning of from respiratory support like noninvasive ventilation / invasive ventilation

Patients requiring low flow O<sub>2</sub> support nasal cannula & mask and maintaining SpO<sub>2</sub> > 92% for more than one day

#### DISCHARGE CRITERIA

If SpO<sub>2</sub> > 92% in room air for 3 days

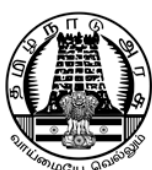

Supplementary Figure S2. Tamil Nadu COVID-19 Case Management Protocol

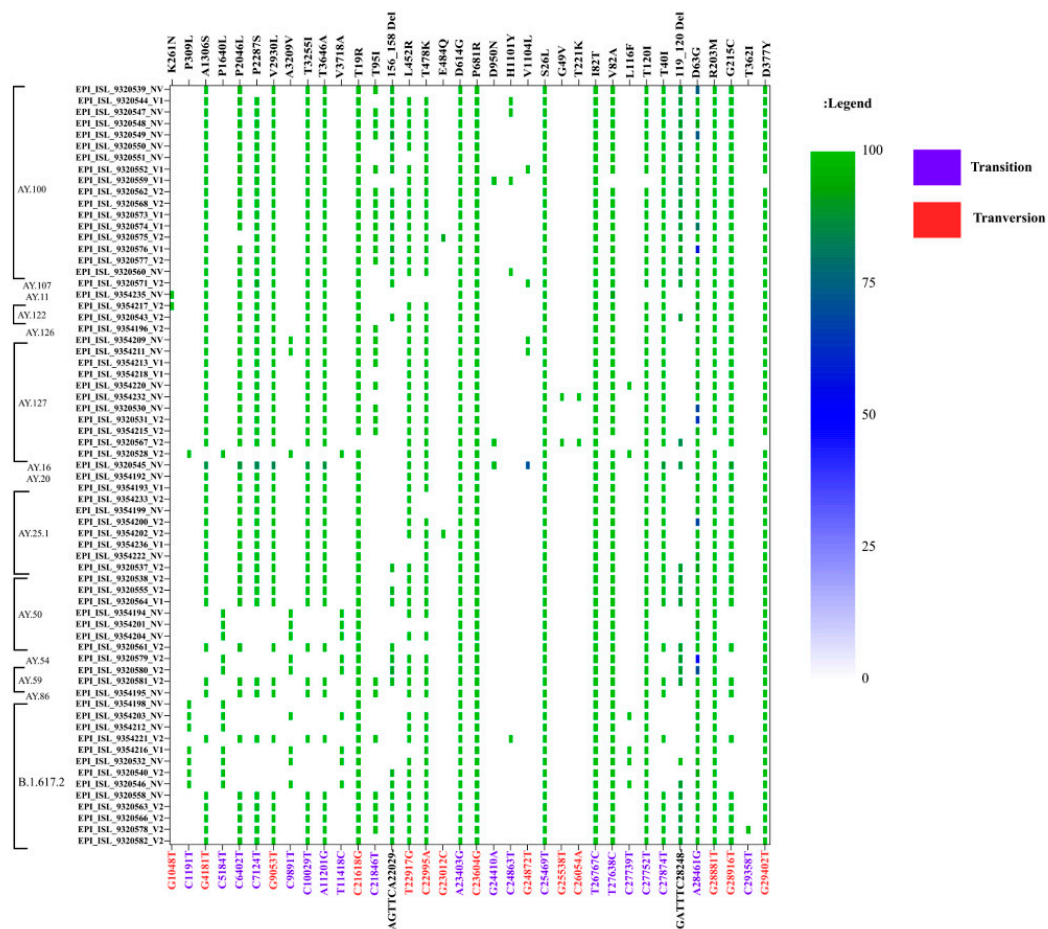

**Supplementary Figure S3.** Single nucleotide variations in the SARS CoV-2 sequences retrieved from the clinical samples collected from the 45+ age group individuals who were positive for SARS-CoV-2 in COVID-19 Vaccine effectiveness Study, Chennai, India, 2021.
